# Supplementary material
Source: HighWire-hosted journal article supplement (https://bmjopen.bmj.com/content/12/9/e061627)
Supplement: inline-supplementary-material-2 [file inline-supplementary-material-2.pdf]

**Appendix Table 1. Motion control features of participants' usual shoes, reported as number (%) unless otherwise stated.**

|                                                              | Motion control shoes<br>(n=18) | Neutral shoes<br>(n=22) |
|--------------------------------------------------------------|--------------------------------|-------------------------|
| Multiple density midsole                                     | 6 (33)                         | 5 (23)                  |
| Fixation                                                     |                                |                         |
| Laces                                                        | 12 (67)                        | 16 (73)                 |
| Straps/buckles                                               | 3 (17)                         | 1 (5)                   |
| Velcro                                                       | 1 (6)                          | 1 (5)                   |
| None                                                         | 2 (11)                         | 4 (18)                  |
| Heel counter stiffness                                       |                                |                         |
| Rigid                                                        | 7 (39)                         | 13 (59)                 |
| Moderate                                                     | 3 (17)                         | 4 (18)                  |
| Minimal                                                      | 6 (33)                         | 4 (18)                  |
| No heel counter                                              | 2 (11)                         | 1 (5)                   |
| Midfoot sagittal stability                                   |                                |                         |
| Rigid                                                        | 6 (33)                         | 4 (18)                  |
| Moderate                                                     | 1 (6)                          | 2 (9)                   |
| Minimal                                                      | 11 (61)                        | 16 (73)                 |
| Midfoot torsional stability                                  |                                |                         |
| Rigid                                                        | 11 (61)                        | 16 (73)                 |
| Moderate                                                     | 4 (22)                         | 3 (14)                  |
| Minimal                                                      | 3 (17)                         | 3 (14)                  |
| Overall motion control feature score, mean (SD) <sup>a</sup> | 6.2 (3)                        | 6.4 (3)                 |

<sup>a</sup> Measured using the Footwear Assessment Tool; scores range 0 to 11, with higher scores indicating more motion control features.

SD = standard deviation.

**Appendix Table 2. Adherence to allocated footwear across groups.**

|                                                                             | Motion control shoes <sup>a</sup> | Neutral shoes <sup>b</sup> |
|-----------------------------------------------------------------------------|-----------------------------------|----------------------------|
| Shoe wear in log books (hours/day), mean (SD):                              |                                   |                            |
| Month 1                                                                     | 7.1 (2.2)                         | 7.9 (2)                    |
| Month 2                                                                     | 7.1 (4.0)                         | 8.5 (3)                    |
| Month 3                                                                     | 7.0 (4.3)                         | 7.8 (3)                    |
| Month 4                                                                     | 6.6 (3.7)                         | 8.1 (2)                    |
| Month 5                                                                     | 7.5 (3.9)                         | 7.4 (3)                    |
| Month 6                                                                     | 7.7 (3.9)                         | 8.0 (3)                    |
| Overall                                                                     | 7.0 (3.4)                         | 8.0 (2)                    |
| Participants classified as adherent <sup>c</sup> , n (%):                   |                                   |                            |
| Month 1                                                                     | 13 (72)                           | 19 (86)                    |
| Month 2                                                                     | 10 (59)                           | 18 (82)                    |
| Month 3                                                                     | 11 (61)                           | 18 (82)                    |
| Month 4                                                                     | 10 (59)                           | 18 (82)                    |
| Month 5                                                                     | 12 (75)                           | 15 (71)                    |
| Month 6                                                                     | 12 (80)                           | 18 (86)                    |
| Overall <sup>d</sup>                                                        | 10 (56)                           | 19 (86)                    |
| Self-rated adherence with allocated footwear over 6 months (NRS), mean (SD) | 7.9 (2.8)                         | 8.5 (1.9)                  |

<sup>a</sup> n=17 for shoe wear and participants classified as adherent at month 2 and month 4; n=16 for shoe wear and participants classified as adherent at month 5; n=15 for shoe wear and participants classified as adherent at month 6; n=18 for all other outcomes.

<sup>b</sup> n=21 for shoe wear and participants classified as adherent at month 5 and month 6; n=22 for all other outcomes.

<sup>c</sup> Adherent defined as an average of  $\geq 6$  hours/day shoe wear for that month;

<sup>d</sup> Overall are participants who averaged  $\geq 6$  hours/day shoe wear over 6 months.

NRS = numerical rating scale, where 0 = shoes not worn at all and 10 = worn completely as instructed; SD = standard deviation.

**Appendix Table 3. Reasons for participants to cease wearing shoes over the course of the trial, reported as number (%).**

|                                      | <b>Motion control shoes<br/>(n=18)</b> | <b>Neutral shoes<br/>(n=22)</b> |
|--------------------------------------|----------------------------------------|---------------------------------|
| Fractured ankle (unrelated to shoes) | 1 <sup>a</sup> (6)                     | 0 (0)                           |
| Total                                | 1 (6)                                  | 0 (0)                           |

<sup>a</sup> Participant ceased wearing shoes in month 2.

**Appendix Table 4: Difference<sup>a</sup> in change between groups, for the primary outcome, change in knee pain on walking (baseline – 6 months), assuming full adherence<sup>b</sup> (N=40).**

|                                         | Difference in change between groups<br>Baseline to 6 months |         |
|-----------------------------------------|-------------------------------------------------------------|---------|
|                                         | Mean difference<br>(95% CI)                                 | P-value |
| Knee pain on walking (NRS) <sup>c</sup> | 0.6 (-1.7, 2.9)                                             | 0.59    |

<sup>a</sup>The complier average causal effect difference, adjusted for the outcome at baseline and radiographic severity (Kellgren & Lawrence Grade).

<sup>b</sup>The treatment effect on the primary outcome assuming full adherence (where full adherence was defined as an average of  $\geq 6$  hours/day shoe wear over 6 months) was estimated using an instrumental variables approach (where randomization was the instrument for adherence).<sup>c</sup> For difference in change between groups, negative differences favour motion control shoe group.

CI=confidence intervals; NRS=numerical rating scale (0-10; higher scores indicate worse pain).

**Appendix Table 5: Results of the moderation analysis for radiographic disease severity (Kellgren & Lawrence Grade) as a potential binary moderator for the primary outcome, change in knee pain on walking, using complete case data.<sup>a</sup>**

|                                | Mean (SD)<br>Motion control<br>shoes <sup>b</sup> | Neutral<br>shoes <sup>c</sup> | Neutral shoes – motion<br>control shoes<br>Mean difference <sup>d</sup> (95% CI) | Interaction<br>P-value |
|--------------------------------|---------------------------------------------------|-------------------------------|----------------------------------------------------------------------------------|------------------------|
| Radiographic disease severity  |                                                   |                               |                                                                                  | 0.70                   |
| Grade 2 (mild) or 3 (moderate) | 1.50 (2.37)                                       | 1.69 (2.46)                   | 0.16 (-1.65, 1.96)                                                               |                        |
| Grade 4 (severe)               | 1.38 (1.92)                                       | 1.78 (1.72)                   | 0.73 (-1.44, 2.90)                                                               |                        |

<sup>a</sup> Presented as the mean scores on the primary outcome, change in average knee pain on walking (baseline – 6 months), in each group in each radiographic disease severity category, as well as in terms of the estimated mean difference in effect between groups (neutral shoes – motion control shoes) on the primary outcome in each radiographic disease severity category, adjusted for the outcome at baseline.

<sup>b</sup> n=10 for Grade 2 or 3; n=13 for Grade 4;

<sup>c</sup> n=8 for Grade 2 or 3; n=9 for Grade 4.

<sup>d</sup> Negative differences favour motion control shoes.

CI=confidence intervals; SD=standard deviation.

**Appendix Table 6: Results of the moderation analysis for potential continuous moderators for the primary outcome, change in knee pain on walking, using complete case data<sup>a</sup>.**

| Potential Moderator <sup>b</sup><br>(taken at baseline) | Motion control shoes<br>Moderator Coeff.<br>(95% CI) | P-value | Neutral shoes<br>Moderator Coeff.<br>(95% CI) | P-value | Difference <sup>c</sup> in coefficients,<br>Neutral shoes – motion<br>control shoes (95% CI) | Interaction<br>P-value |
|---------------------------------------------------------|------------------------------------------------------|---------|-----------------------------------------------|---------|----------------------------------------------------------------------------------------------|------------------------|
| Foot Posture Index <sup>d</sup>                         | 0.09 (-0.29, 0.46)                                   | 0.64    | 0.11 (-0.15, 0.37)                            | 0.41    | 0.02 (-0.44, 0.48)                                                                           | 0.92                   |
| Radiographic knee alignment<br>(degrees)                | 0.15 (-0.03, 0.34)                                   | 0.11    | -0.08 (-0.27, 0.12)                           | 0.42    | -0.23 (-0.49, 0.03)                                                                          | 0.085                  |
| KOOS sub-scale:<br>Patellofemoral pain and OA           | 0.03 (-0.04, 0.10)                                   | 0.33    | 0.06 (-0.01, 0.13)                            | 0.097   | 0.02 (-0.06, 0.11)                                                                           | 0.58                   |

<sup>a</sup> Presented in terms of the estimated mean effect on the primary outcome, change in average knee pain on walking (baseline – 6 months), of a one-unit increase in the potential moderator in each of the motion control shoe group and neutral shoe group, adjusted for the outcome at baseline and radiographic severity (Kellgren & Lawrence Grade 2, 3 or 4).

<sup>b</sup> n=32 for radiographic knee alignment, n=40 for all other potential moderators.

<sup>c</sup> Negative differences favour motion control shoes.

<sup>d</sup> Scored from -12 to 12; higher scores indicating a more pronated foot posture.

CI=confidence intervals; KOOS = Knee Injury and Osteoarthritis Outcome Score (0 to 100; lower scores indicating worse pain/patellofemoral problems); OA = osteoarthritis.
